# Fine Tuning of the Lactate and Diacetyl Production through Promoter Engineering in *Lactococcus lactis*

Tingting Guo, Jian Kong\*, Li Zhang, Chenchen Zhang, Shumin Hu

State Key Laboratory of Microbial Technology, Shandong University, Jinan, People's Republic of China

## Abstract

*Lactococcus lactis* is a well-studied bacterium widely used in dairy fermentation and capable of producing metabolites with organoleptic and nutritional characteristics. For fine tuning of the distribution of glycolytic flux at the pyruvate branch from lactate to diacetyl and balancing the production of the two metabolites under aerobic conditions, a constitutive promoter library was constructed by randomizing the promoter sequence of the H<sub>2</sub>O-forming NADH oxidase gene in *L. lactis*. The library consisted of 30 promoters covering a wide range of activities from 7,000 to 380,000 relative fluorescence units using a green fluorescent protein as reporter. Eleven typical promoters of the library were selected for the constitutive expression of the H<sub>2</sub>O-forming NADH oxidase gene in *L. lactis*, and the NADH oxidase activity increased from 9.43 to 58.17-fold of the wild-type strain in small steps of activity change under aerobic conditions. Meanwhile, the lactate yield decreased from 21.15±0.08 mM to 9.94±0.07 mM, and the corresponding diacetyl production increased from 1.07±0.03 mM to 4.16±0.06 mM with the intracellular NADH/NAD<sup>+</sup> ratios varying from 0.711±0.005 to 0.383±0.003. The results indicated that the reduced pyruvate to lactate flux was rerouted to the diacetyl with an almost linear flux variation via altered NADH/NAD<sup>+</sup> ratios. Therefore, we provided a novel strategy to precisely control the pyruvate distribution for fine tuning of the lactate and diacetyl production through promoter engineering in *L. lactis*. Interestingly, the increased H<sub>2</sub>O-forming NADH oxidase activity led to 76.95% lower H<sub>2</sub>O<sub>2</sub> concentration in the recombinant strain than that of the wild-type strain after 24 h of aerated cultivation. The viable cells were significantly elevated by four orders of magnitude within 28 days of storage at 4°C, suggesting that the increased enzyme activity could eliminate H<sub>2</sub>O<sub>2</sub> accumulation and prolong cell survival.

**Citation:** Guo T, Kong J, Zhang L, Zhang C, Hu S (2012) Fine Tuning of the Lactate and Diacetyl Production through Promoter Engineering in *Lactococcus lactis*. PLoS ONE 7(4): e36296. doi:10.1371/journal.pone.0036296

**Editor:** Paul Jaak Janssen, Belgian Nuclear Research Centre SCK/CEN, Belgium

**Received:** November 16, 2011; **Accepted:** March 30, 2012; **Published:** April 27, 2012

**Copyright:** © 2012 Guo et al. This is an open-access article distributed under the terms of the Creative Commons Attribution License, which permits unrestricted use, distribution, and reproduction in any medium, provided the original author and source are credited.

**Funding:** This work was financially supported by a grant from the National Natural Science Foundation of China (NSFC, grant no. 31070091, <http://www.nsf.gov.cn/Portal0/default106.htm>); a grant from the Specialized Research Fund for the Doctoral Program of Higher Education (SRFDP, grant no. 20100131110035, <http://www.cutech.edu.cn/cn/index.htm>); and Hi-tech Research and Development Program of China (grant no. 2011AA100902, <http://www.863.gov.cn/>). The funders had no role in study design, data collection and analysis, decision to publish, or preparation of the manuscript.

**Competing Interests:** The authors have declared that no competing interests exist.

\* E-mail: kongjian@sdu.edu.cn

## Introduction

*Lactococcus lactis* has long been used in dairy fermentation processes and considered as one of the most important starter cultures. It produces multifarious end metabolites during dairy fermentation, such as lactate, diacetyl, acetoin, vitamins and extracellular exopolysaccharides which contribute to the organoleptic and health-promoting properties of the fermented products [1–4]. *L. lactis* has become a model for rational industrial strain improvement because of its relatively small genome, simple metabolism and industrial relevance [5].

Diacetyl is an important aroma compound and essential for the flavor of dairy products. Normally, *L. lactis* undergoes homolactic fermentation, and most of the central intermediate pyruvate is converted to lactate, a reaction catalyzed by lactate dehydrogenase (LDH) with the oxidation of NADH to NAD<sup>+</sup> for maintaining a redox balance [6]. Under aerobic conditions, the activities of  $\alpha$ -acetolactate synthase (ALS) and NADH oxidase (NOX) are strongly increased [7]. ALS catalyzes the pyruvate to  $\alpha$ -acetolactate. After decarboxylation,  $\alpha$ -acetolactate is further converted to acetoin and diacetyl. The reoxidation of NADH by NOX would replace the role of the LDH in the regeneration of NAD<sup>+</sup>, allowing the accumulation of these two aroma compounds

(Figure 1) [8]. However, in the presence of O<sub>2</sub>, *L. lactis* displays the metabolic shift from homolactic to mixed-acid product formation, including lactate, acetate and CO<sub>2</sub>. Hence, diacetyl accumulation is rather limited [9]. Therefore, several approaches to improve diacetyl production in *L. lactis* have been developed, such as the overexpression of the *als* and *nox-2* genes and the inactivation of the *ldh* and  $\alpha$ -acetolactate decarboxylase (*aldB*) genes. The herein excessive pyruvate was channeled to acetoin or diacetyl via ALS, whereas the flux from pyruvate to lactate was almost abolished [8,10–12]. Considering that lactate is an important metabolite that prevents fermented products from spoilage and contributes to the texture of dairy products, the strong overexpression or complete deletion of target genes limits the application of genetically modified lactic acid bacteria as starter cultures for industrial production of dairy products. Thus, strategies for the fine-tuning of gene expression are required to control the aimed metabolic fluxes.

Promoter engineering is interpreted as the creation of a functional promoter library for precisely controlling gene expression to perform metabolic optimization or control analysis. It has promising perspectives with respect to the research of functional genomics, cell network analysis and synthetic biology [13–15]. For example, a series of mutant *L. lactis* strains have been constructed

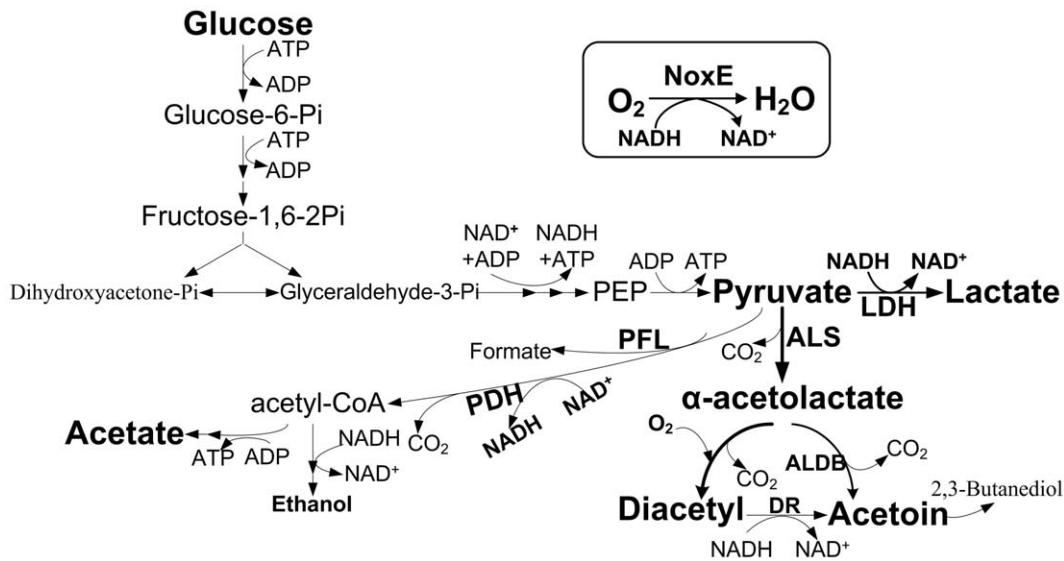

**Figure 1. Metabolic pathway of glycolysis and diacetyl biosynthesis in *L. lactis*.** PEP, phosphoenolpyruvate; LDH, lactate dehydrogenase; ALS,  $\alpha$ -acetolactate synthase; ALDB, acetolactate decarboxylase; PDH, pyruvate dehydrogenase; DR, diacetyl reductase; PFL, pyruvate formate lyase; NoxE, H<sub>2</sub>O-forming NADH oxidase.  
doi:10.1371/journal.pone.0036296.g001

based on synthetic promoters to demonstrate that LDH exerted virtually no control on the glycolytic flux at the wild-type enzyme level and the lactate production [16]. In addition, a synthetic promoter library has been used to evaluate the influence of different production levels of glucose-6-phosphate dehydrogenase on xylose fermentation and ethanol yield in *Saccharomyces cerevisiae* [17]. These previous studies have illustrated the valuable applications of the promoter engineering in the precise control and the quantitative assessment of gene expression level.

*L. lactis* is a facultatively anaerobic bacterium and O<sub>2</sub> has negative effects on both cell growth and survival, because *in vivo* O<sub>2</sub> is converted into reactive oxygen species (ROS) which cause protein, lipid and nucleic acid damage [18]. To cope with oxygen toxicity, *L. lactis* could grow via respiratory metabolism when heme is available [19]. Some lactic acid bacteria have antioxidant enzymes to detoxify O<sub>2</sub>-derived compounds [20]. Aside from the toxic effects of O<sub>2</sub>, aeration could induce the metabolic shift from homolactic to mixed-acid fermentation, making pyruvate metabolism more flexible. Therefore, lowering cytoplasmic O<sub>2</sub> is economically significant in improving cell growth and survival under aerobic conditions.

Here we constructed a constitutive promoter library by randomizing the space sequence between the two conserved motifs of the promoter of the H<sub>2</sub>O-forming NADH oxidase (*noxE*) gene in *L. lactis*. Under the control of individual random promoters, the fine tuning of lactate and diacetyl production was achieved by precisely regulating the intracellular NADH/NAD<sup>+</sup> ratios in *L. lactis*. Furthermore, the beneficial effects of the increased NoxE activity on cell survival were also investigated in this study.

## Materials and Methods

### Plasmids, bacterial strains and growth conditions

The plasmids used in this study are listed in Table 1. *E. coli* DH5 $\alpha$  was grown aerobically in Luria Bertani broth at 37°C. The plasmid-free strain *L. lactis* MG1363 was used as host for the construction of the constitutive promoter library and considered as

a wild-type strain in this study [21]. The *L. lactis* DA strain was a derivative of *L. lactis* MG1363 with the *aldB* gene deletion. *L. lactis* was grown in M17 broth (Oxoid, Basingstoke, United Kingdom) containing 0.25% (wt/vol) glucose (GM17) at 30°C. For milk fermentation, *L. lactis* was incubated in 12.5% (wt/vol) sterile, reconstituted skim milk (RSM) supplemented with 1% glucose (wt/vol). The following antibiotics were added at the indicated concentrations: chloramphenicol, 5  $\mu$ g/mL for *L. lactis* or 10  $\mu$ g/mL for *E. coli*; erythromycin, 10  $\mu$ g/mL for *L. lactis*; and ampicillin, 100  $\mu$ g/mL for *E. coli*.

### Construction of the constitutive promoter library

The primers used in this study are listed in Table 2. All molecular manipulations were performed as described previously [22]. *Taq* polymerase, restriction enzymes and T4 DNA ligase were used as stated by standard procedures (TaKaRa, Tokyo, Japan).

The scheme for generating the promoter library is shown in Figure 2. The nisin-inducible promoter PnisA and *nuc* gene fragment of the *E. coli*/*L. lactis* shuttle vector pSec:Leiss:Nuc was replaced by the promoterless green fluorescent protein (*gfp*) gene fragment, resulting in the promoter probing vector pGFP.

The *noxE* promoter fragment was PCR amplified from the genomic DNA of *L. lactis* MG1363 with primers NOXEp-for and NOXEp-rev. The PCR product was digested with *Bgl*II and *Pst*I and ligated to compatible ends of the digested pGFP to generate pOgfp. To develop the constitutive promoter library for *L. lactis*, the fragments containing randomized promoters were amplified using primers NOXEp-mut and NOXEp-rev by degenerate PCR with the plasmid pOgfp DNA as template. After digested with *Bgl*II and *Pst*I, the random promoter fragments were inserted into the corresponding sites of the probing vector pGFP to generate the mixed plasmids pMgfp. The mixed plasmids pMgfp were then electrotransformed into the competent cells of *L. lactis* MG1363, and the cells were plated onto the GM17 agar containing chloramphenicol [23]. The colonies ranging in color from white to dark green were picked from the GM17 agar plates. After overnight static incubation at 30°C, each culture was diluted 100-

**Table 1.** Plasmids used in this study.

| Plasmid               | Relevant characteristics                                                                                                                                                                  | Reference or source |
|-----------------------|-------------------------------------------------------------------------------------------------------------------------------------------------------------------------------------------|---------------------|
| pMD18-T               | Cloning vector, Amp <sup>R</sup>                                                                                                                                                          | Takara              |
| pT-GFP                | <i>Bgl</i> III- <i>Pst</i> I- <i>gfp</i> - <i>Eco</i> RI fragment cloned in pMD18-T, Amp <sup>R</sup>                                                                                     | This study          |
| pSec:Leiss:Nuc        | pWV01 replicon, expresses Nuc under <i>Prn</i> sA control, Cm <sup>R</sup>                                                                                                                | [55]                |
| pGFP                  | Promoter probing vector used in the construction of promoter library; pSec:leiss:Nuc derivative with <i>Prn</i> sA and Nuc fragment replaced by <i>gfp</i> gene fragment, Cm <sup>R</sup> | This study          |
| pOgfp                 | pGFP derivative, carrying the native promoter O159, Cm <sup>R</sup>                                                                                                                       | This study          |
| pMgfp                 | pGFP derivatives, carrying individual random promoters of the promoter library, Cm <sup>R</sup>                                                                                           | This study          |
| pG <sup>+</sup> host4 | Derivative of pGK12 used for homologous recombination, Erm <sup>R</sup>                                                                                                                   | [28]                |
| pEnox                 | pMgfp derivative with <i>gfp</i> gene fragment replaced by <i>noxE</i> gene fragment, carrying eleven selected promoters, respectively, Cm <sup>R</sup>                                   | This study          |

doi:10.1371/journal.pone.0036296.t001

fold in 5 mL of fresh GM17 medium and further incubated for 10 h at 30°C. The culture turbidity was monitored by OD600. Cells were collected from 1 mL cultures by centrifugation at 7,000 g for 5 min, washed twice and resuspended in 500 µL of phosphate buffered saline (PBS, 137 mM NaCl, 2.7 mM KCl, 10 mM Na<sub>2</sub>HPO<sub>4</sub>, and 2 mM KH<sub>2</sub>PO<sub>4</sub>, pH 7.4). The fluorescence intensity of the suspension was determined by an LS-50B spectrofluorometer (PerkinElmer) with excitation at 488 nm and emission at 511 nm. To obtain a relative fluorescence unit (RFU), the fluorescence intensity of the cells carrying the promoter probing vector pGFP was used as a background and subtracted from that of cells containing plasmids pMgfp.

**Characterization of the constitutive promoter library**

Eleven colonies with various promoter activities were selected and their promoters were sequenced. The promoter strength was evaluated as described by Alper *et al.* [13]. Growth was monitored

by OD600 every thirty minutes over five hours. At the same intervals, the cultures were sampled and the fluorescence intensities were measured as above. The slope of the fluorescence versus culture turbidity was considered as the exponential growth phase steady-state concentration of GFP.

The cultures in GM17 medium were collected at the exponential phase and the total RNA was extracted with a RNA simple Total RNA Kit (TIANGEN, Beijing, China) according to the manufacturer’s protocols. The quantity and purity of RNA were determined spectrophotometrically at 260 nm and 280 nm. Reverse transcription was performed with Random 6 mers and Oligo dT primer using the PrimeScript RT reagent Kit (TaKaRa, Tokyo, Japan) according to the manufacturer’s instructions. Real-time PCR was performed with the SYBR Premix Ex TaqII (TaKaRa, Tokyo, Japan) applying the protocol in the Real-Time PCR Detection Systems (Bio-Rad, Hercules, CA, USA). The *gfp* transcript was PCR amplified with the primers GFP-for and GFP-

**Table 2.** Oligonucleotide primers used in this study.

| Primer    | Sequences (5'-3')                                                       | Restriction sites |
|-----------|-------------------------------------------------------------------------|-------------------|
| NOXEp-for | GGTAGATCTTTTGATTGAGAACTATGTGG                                           | <i>Bgl</i> III    |
| NOXEp-rev | GATCTGCAGACTAATAGGTCTCCTTA                                              | <i>Pst</i> I      |
| NOXEp-mut | CGGAGATCTNNNNNNNTTGACANNNNNNNNNNNNNNNTANAATNNNNNTTTCACAATGTTCAAGCGCTTAC | <i>Bgl</i> III    |
| GFP-for   | TTCTGTCAGTGGAGAGGGT                                                     |                   |
| GFP-rev   | GGATAACGGGAAAAGCATT                                                     |                   |
| GAP-for   | GCGACAGGTTCTTTGCGA                                                      |                   |
| GAP-rev   | CGTCTGCCATTGGTCTAA                                                      |                   |
| NOXE-for  | CCTCTGCAGGTATGAAAATCGTAGTTATC                                           | <i>Pst</i> I      |
| NOXE-rev  | TTCGTCGACTTATTTGGCATTCAAAGCT                                            | <i>Sal</i> I      |
| TU-for    | ACTCTCGAGCACTAAAATGCGTCAGTCAAT                                          | <i>Xho</i> I      |
| TU-rev    | GGCGAATTCATTTCTCTTTCTATCTCAT                                            | <i>Eco</i> RI     |
| TD-for    | GCGGAATTCGATATTGATGACTGA                                                | <i>Eco</i> RI     |
| TD-rev    | TTGCGGCCGCTCCACTATCTATAAAATG                                            | <i>Not</i> I      |
| DC-for    | ATAATGAATCAGTCAATGCAAGA                                                 |                   |
| DC-rev    | TTTGGGCAATCCAGCAACTCCTA                                                 |                   |

The restriction sites in the primer sequences are underlined.

doi:10.1371/journal.pone.0036296.t002

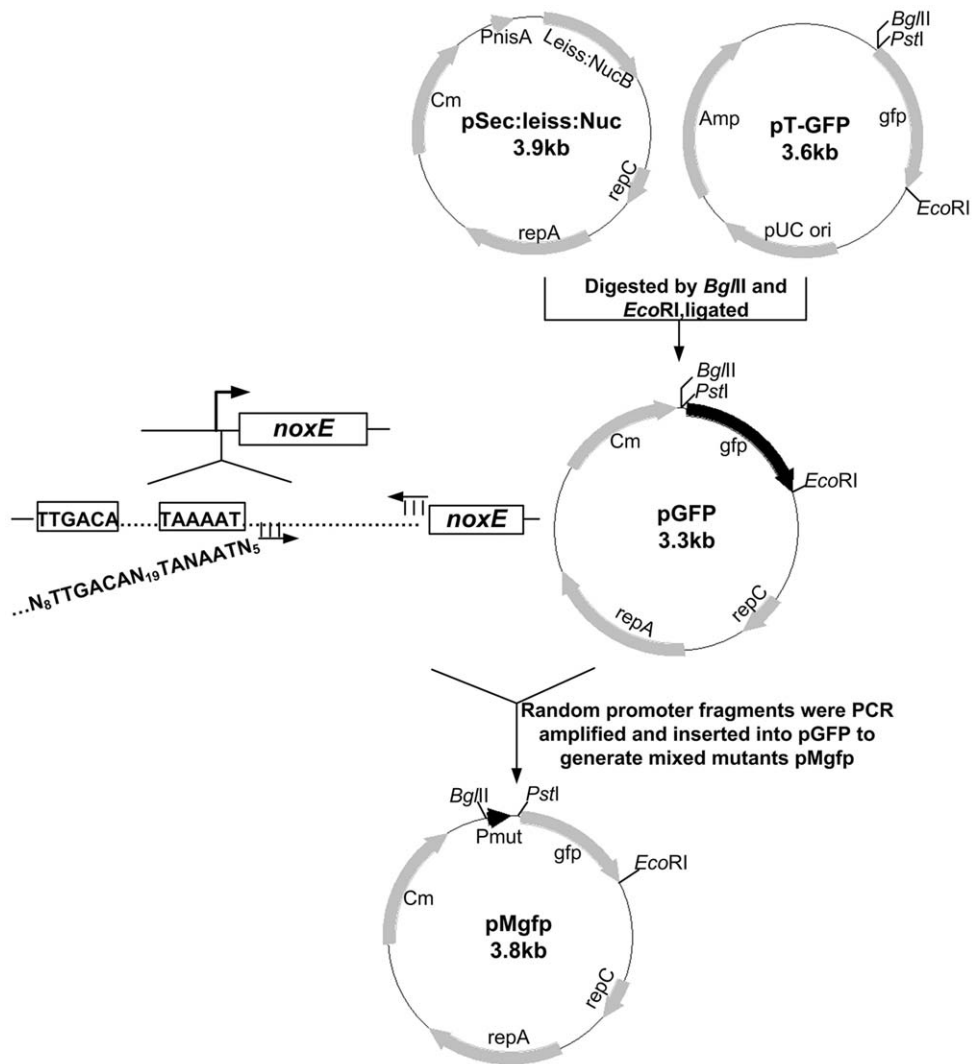

**Figure 2. Scheme for generating the constitutive promoter library in *L. lactis*.** N=A, G, T or C.  
doi:10.1371/journal.pone.0036296.g002

rev. The *gapA* (D-glyceraldehyde-3-phosphate dehydrogenase) transcript used as internal standard was amplified with the primers GAP-for and GAP-rev.

#### Expression of the *noxE* gene with selected promoters

The *noxE* gene was PCR amplified from the genomic DNA of *L. lactis* MG1363 using primers NOXE-for and NOXE-rev. The PCR product was digested by *Pst*I and *Sal*I and inserted into the same sites of vector pMgfp to replace the *gfp* gene, yielding pEnox (E: eleven individual promoters selected). Subsequently, the plasmids were introduced into *L. lactis* DA to obtain recombinant *L. lactis* DA/pEnox, respectively. The expression of the *noxE* gene under the control of eleven promoters was analyzed via the intracellular NoxE activity assay. See below for details.

#### Fermentation conditions and analytical methods

The recombinant strains were pre-cultured in 5 mL of GM17 medium, and 2 mL of the overnight cultures were incubated in 500-mL Erlenmeyer flasks with 100 mL of GM17 medium with 200 rpm orbital shaking at 30°C.

Cell growth was monitored by OD600. Glucose, acetate, lactate, formate and ethanol were analyzed by high-performance liquid chromatography (HPLC; Shimadzu, Japan) using a column of Aminex HPX-87H Ion Exclusion particles (300 mm×7.8 mm, Bio-Rad, Hercules, CA, USA), at a column temperature of 65°C with 5 mM sulfuric acid as the mobile phase at a flow rate of 0.6 mL/min. Acetoin,  $\alpha$ -acetolactate and diacetyl were determined according to Benson et al. [24].  $H_2O_2$  was measured using the  $H_2O_2$  quantified analysis Kit (Sangon Biotech, Shanghai, China). NADH and  $NAD^+$  were extracted as described previously [25], and their concentrations were measured by enzyme cycling assay [26,27].

#### Enzymatic measurements

Cells from 5 mL cultures were collected by centrifugation and washed twice with potassium phosphate buffer (pH 7.0). The cells were resuspended in 2.5 mL of potassium phosphate buffer and disrupted by sonication on ice (400 w, sonication for 3 s, intermission for 8 s). The supernatant was recovered by centrifugation at 12,000 g for 10 min to determine the *in vivo* enzyme

activities. The protein concentration was determined using the Bradford protein assay with bovine serum albumin as standard.

The NoxE activity was determined spectrophotometrically by measuring the initial rate of NADH oxidation at 25°C. The total 200  $\mu$ L assay mixture contained 0.3 mM NADH and 0.3 mM EDTA in 50 mM potassium phosphate buffer. The reaction was initiated by adding 10  $\mu$ L of cell extract and monitored by the decrease at OD340nm using Spectra MAX 190 (Molecular Devices Corporation, U.S.A.). A unit enzyme was defined as the amount which catalyzed the oxidation of 1  $\mu$ mol of NADH to NAD<sup>+</sup> per minute at 25°C. LDH activity was determined according to the method of Andersen et al. [16].

### Deletion of the *aldB* gene

The upstream and downstream sequences of the *aldB* gene were PCR amplified from the genomic DNA of *L. lactis* MG1363 with primers TU-for/TU-rev and TD-for/TD-rev, and then inserted into the vector pG<sup>+</sup>host4, respectively. Subsequently, the resulting plasmid was used to perform homologous double-cross in the *L. lactis* MG1363 chromosome as the modified method described previously [28]. Gene deletion was verified by PCR amplification with the primer DC-for and DC-rev.

## Results

### Construction of the constitutive promoter library

The sequence alignment of the *noxE* promoter located at *L. lactis* MG1363 genome with the consensus promoter sequences of *L. lactis* revealed that the -35 region had high identity with the TTGACA sequence, whereas the -10 region was less conserved with the sequence TAAAT deviating from the canonical TATAAT sequence in the 3rd position. In our strategy, the -35 region nucleotides were kept constant and the -10 region was generally maintained except the 3rd base A was randomized, yielding TANAAT (N = A, T, G or C). The spacing between the -10 and -35 region had 19 completely random nucleotides. Furthermore, the randomization was also introduced into 8 bases upstream of the -35 region and 5 bases downstream of the -10 region for higher diversity of random promoters.

To screen the random promoters easily, a promoter probing vector pGFP was constructed using GFP as reporter based on the *E. coli/L. lactis* shuttle vector pSec:leiss:Nuc. The randomized promoter fragments were inserted into pGFP, and the resulting plasmids pMgfp were transformed into *L. lactis* MG1363. Five hundred colonies of *L. lactis* MG1363/pMgfp carrying individual random promoters were picked by observation of the green color on the GM17 plates. To assess the promoter activities, the fluorescence intensities of the colonies were determined and 30 representative random promoters were selected to form a constitutive promoter library (Figure 3). The promoter activities of the library spanned from 7,000 to 380,000 RFU, covering 3 to 4 logs of expression levels in small increments. Six random promoters showing higher activity than the native promoter O159 were obtained, and the most potent promoter B6 exhibited a 2.8-fold activity increment.

### Characterization of the promoter library

Eleven promoters (B6, B21, B89, D2, A32, A19, A97, A56, A12, A1 and A17) with activities covering from 23,000 to 380,000 RFU were selected for the sequence analysis. As shown in Figure 4A, all selected promoters had a DNA sequence identical to specific sequence of the designed oligonucleotide NOXEp-mut. No base change was observed in the -35 region, while base changes were found in the -10 region of five promoters which exhibited lower

activity than that of the native promoter O159. The base T insertion was observed in the spacer of promoter A17, resulting in a drastic reduction in promoter activity. The alignment showed that the higher similarity of sequences outside the conserved regions between the random promoter and the native led to stronger promoter activity.

To eliminate the effects of protein maturation, degradation and cell growth rate on the GFP fluorescence intensity, the eleven promoters strength were determined by a dynamic model in which the influencing factors were comprehensively considered [13]. Based on this model, the promoter strength of the library varied from  $55,006 \pm 79$  to  $311,982 \pm 410$  and increased by 17.51% on average between the adjacent promoters (Figure 4B).

To characterize the promoter library at transcriptional level, relative mRNA levels of the *gfp* transcripts under the control of eleven promoters were analyzed by Real-Time PCR. The relative level of the *gfp* transcript spanned a 17.49-fold variation and correlated well with the promoter strength (Figure 4B).

### Tuning of the lactate and diacetyl production in *L. lactis*

To investigate the regulation capacity of different promoters on the distribution of the pyruvate flux to lactate and diacetyl, the sequenced promoters were fused with the *noxE* gene from *L. lactis* MG1363. Then, the resulting plasmids (pB6nox, pB21nox, pB89nox, pD2nox, pA32nox, pA19nox, pA97nox, pA56nox, pA12nox, pA1nox and pA17nox) were introduced into *L. lactis* DA which was unable to convert  $\alpha$ -acetolactate to acetoin by acetolactate decarboxylase. The NoxE activities of the recombinant strains were determined at the late exponential phase. As expected, the NoxE activity of *L. lactis* DA was very low ( $0.23 \pm 0.05$  U/mg protein). In the eleven recombinants, it showed linear increase with the promoter strength, from  $2.17 \pm 0.12$  U/mg protein to  $13.11 \pm 0.28$  U/mg protein (Figure 4C). However, the differences in the enzyme activity between the adjacent promoters did not exceed 1.5 units except promoter B6 which was 3.8 units higher than the next promoter B21. Moreover, the LDH activity of the recombinant strains was very similar to that of wild-type ( $7.21 \pm 0.14$  U/mg protein).

After 12 h of aerobic culture in GM17 medium, the cell growth and glucose consumption rate of *L. lactis* DA and eleven recombinant strains were similar to those of the wild-type *L. lactis* MG1363, indicating that genetic modification had little influence on *L. lactis* growth. As shown in Table 3, the intracellular NADH/NAD<sup>+</sup> ratios varied from  $0.711 \pm 0.005$  to  $0.383 \pm 0.003$  by controlling the expression of the NoxE. The lactate accumulation exhibited a nearly linear decrease from  $21.15 \pm 0.08$  mM to  $9.94 \pm 0.07$  mM, whereas the diacetyl yield showed a gradual increase from  $1.07 \pm 0.03$  mM to  $4.16 \pm 0.06$  mM. These results indicated that the decreased pyruvate flux to the LDH pathway was rerouted to the ALS pathway accompanied by the enhancement of NoxE activity. Meanwhile, acetate yield in the recombinant strains was on average 2.48 mM higher than that of the strain *L. lactis* DA and acetoin accumulation was still detectable in the recombinant strains. In the *aldB*-deficient strains, the unstable intermediate  $\alpha$ -acetolactate was directly converted to diacetyl, which was subsequently reduced to acetoin by diacetyl reductase in the presence of O<sub>2</sub>. The acetoin and diacetyl yields were undetectable in *L. lactis* DA, whereas the lactate and acetate production were  $23.41 \pm 0.11$  mM and  $8.47 \pm 0.47$  mM, respectively.

Among the eleven recombinant strains, *L. lactis* DA/pB6nox consumed 33.96% and 23.88% of the carbon flux towards lactate and diacetyl under aerobic conditions, respectively. After *L. lactis* DA/pB6nox incubation in RSM supplemented with 1% glucose

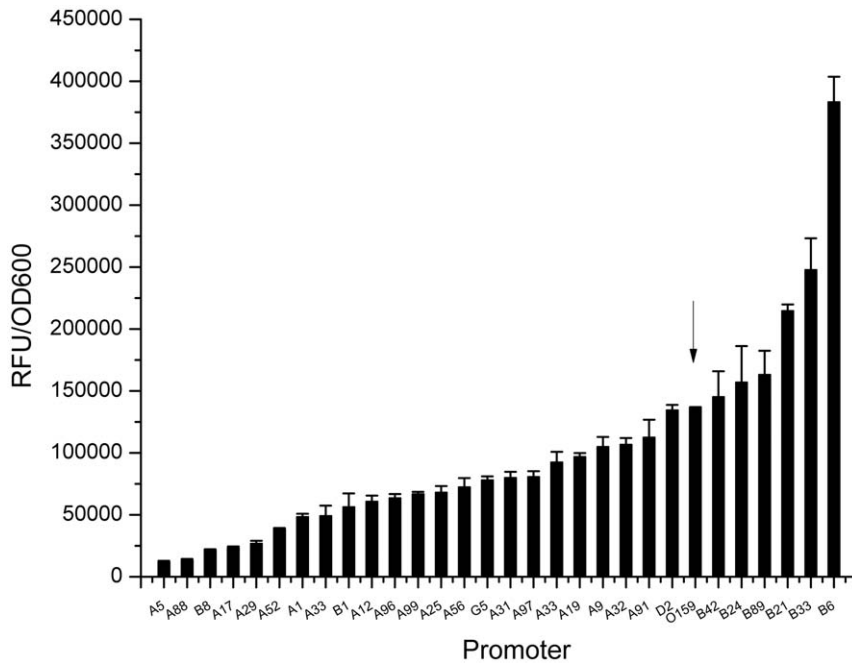

**Figure 3. Promoter library for constitutive gene expression in *L. lactis*.** The activity of the promoter is measured as RFU per OD600. The data are the means and standard deviations of results from five independent experiments. The arrowhead indicates the native promoter O159. doi:10.1371/journal.pone.0036296.g003

for 24 h, lactate production was  $11.78 \pm 0.32$  mM and diacetyl production was  $2.93 \pm 0.21$  mM with the pH decreasing from 6.63 to  $5.02 \pm 0.01$ . The lactate yield in *L. lactis* DA was

$32.05 \pm 1.05$  mM with the pH decreasing from 6.61 to  $4.67 \pm 0.03$ , whereas little diacetyl was accumulated (Figure 5A and 5B).

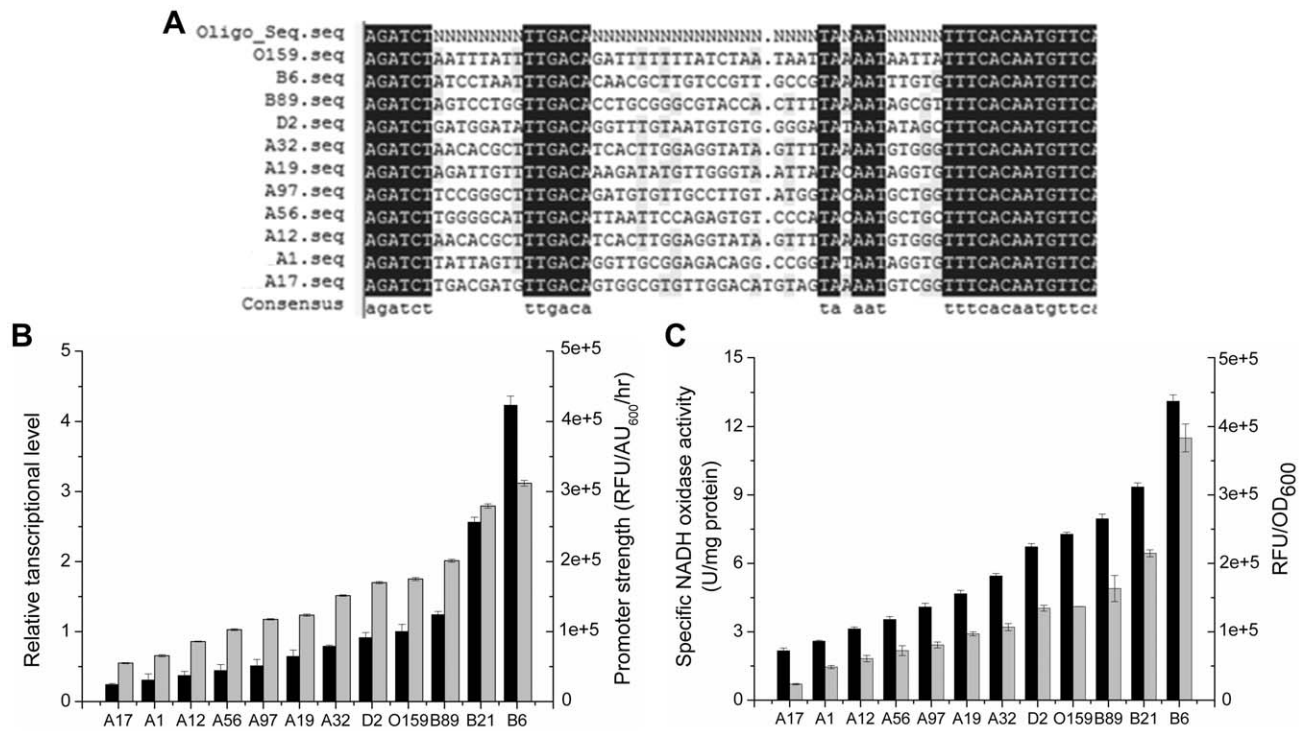

**Figure 4. Characterization of the promoter library.** (A) Sequence analysis of the selected promoters. N=A, G, T or C. (B) Determination of promoter strength from the transcript quantification of the *gfp* gene (black) and dynamics of GFP production based on fluorescence intensity (gray). (C) Specific NoxE activity (black) under the control of eleven selected promoters (promoter activity is shown as gray). In panels (B) and (C) the values are means  $\pm$  standard deviations of three independent experiments. doi:10.1371/journal.pone.0036296.g004

**Table 3.** pH, product and NADH/NAD<sup>+</sup> ratios of different recombinant strains at initial growth pH of 7.3 after 12 h aerobic culture.

| Strains    | Final pH  | Concentrations of pyruvate metabolites (mM) |            |           |           | NADH/NAD <sup>+</sup> ratio |
|------------|-----------|---------------------------------------------|------------|-----------|-----------|-----------------------------|
|            |           | Lactate                                     | Acetate    | Diacetyl  | Acetoin   |                             |
| DA         | 5.93±0.03 | 23.41±0.11                                  | 8.47±0.14  | ND        | ND        | 0.741±0.009                 |
| DA/pA17nox | 6.02±0.04 | 21.15±0.08                                  | 8.40±0.15  | 1.07±0.03 | 0.69±0.02 | 0.711±0.005                 |
| DA/pA1nox  | 6.05±0.02 | 20.28±0.13                                  | 8.43±0.09  | 1.19±0.01 | 0.87±0.05 | 0.689±0.006                 |
| DA/pA12nox | 6.05±0.05 | 19.86±0.29                                  | 9.26±0.1   | 1.51±0.03 | 0.92±0.03 | 0.681±0.002                 |
| DA/pA56nox | 6.07±0.02 | 19.09±0.12                                  | 9.12±0.14  | 1.8±0.01  | 1.01±0.04 | 0.556±0.008                 |
| DA/pA97nox | 6.10±0.01 | 18.15±0.21                                  | 10.29±0.13 | 1.8±0.04  | 1.05±0.01 | 0.55±0.005                  |
| DA/pA19nox | 6.10±0.01 | 17.46±0.17                                  | 11.08±0.07 | 1.84±0.05 | 1.05±0.03 | 0.541±0.005                 |
| DA/pA32nox | 6.12±0.02 | 16.24±0.1                                   | 11.96±0.08 | 2.02±0.04 | 1.38±0.01 | 0.462±0.002                 |
| DA/pD2nox  | 6.14±0.04 | 14.21±0.13                                  | 13.11±0.12 | 2.26±0.02 | 1.67±0.05 | 0.457±0.002                 |
| DA/pB89nox | 6.18±0.01 | 13.00±0.09                                  | 13.42±0.21 | 2.39±0.06 | 1.96±0.04 | 0.413±0.004                 |
| DA/pB21nox | 6.22±0.02 | 11.76±0.16                                  | 13.09±0.01 | 3.38±0.12 | 2.14±0.04 | 0.406±0.003                 |
| DA/pB6nox  | 6.32±0.03 | 9.94±0.07                                   | 12.34±0.14 | 4.16±0.06 | 2.83±0.06 | 0.383±0.003                 |

ND, not detected. The values are means ± standard deviations for three independent experiments.  
doi:10.1371/journal.pone.0036296.t003

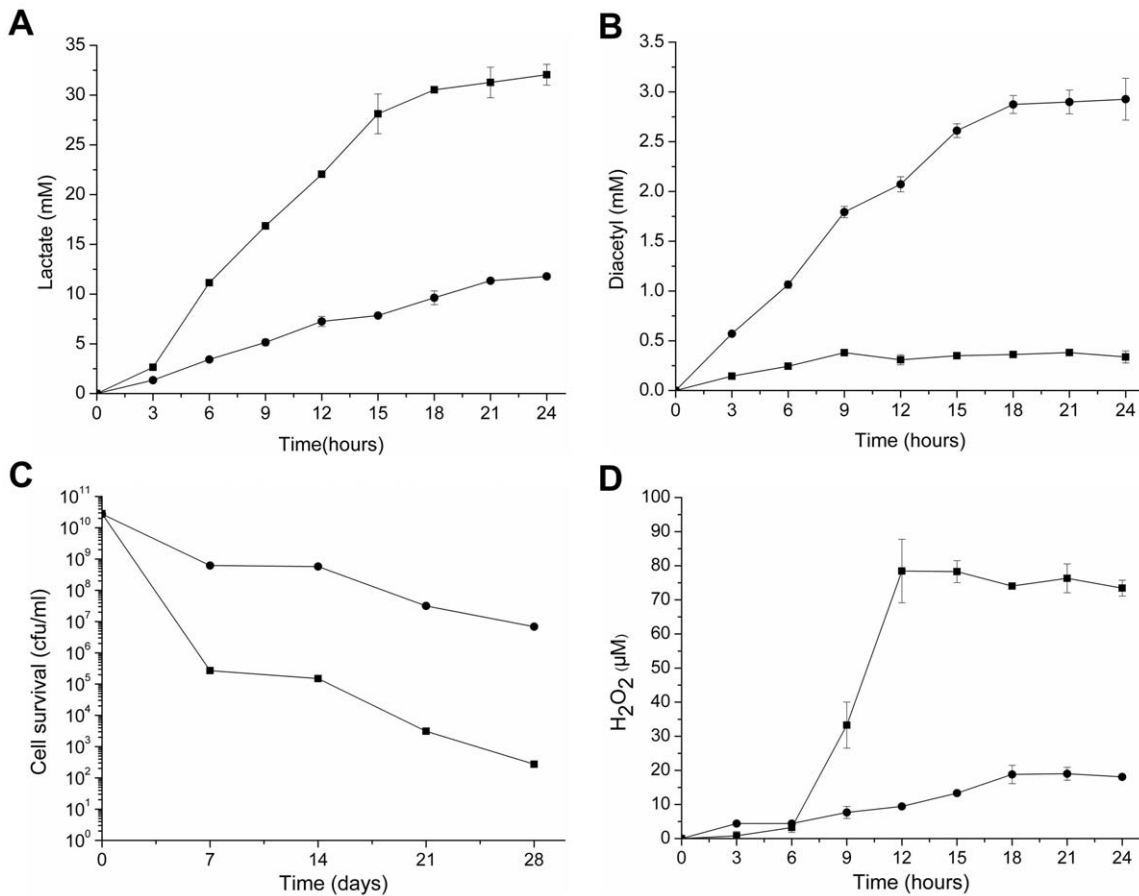

**Figure 5. Metabolite accumulation and cell survival of *L. lactis* DA and the recombinant strain.** Lactate production (A) and diacetyl production (B) by strains *L. lactis* DA (■) and *L. lactis* DA/pB6nox (●) in RSM added 1% (wt/vol) glucose. Cell survival (C) and H<sub>2</sub>O<sub>2</sub> accumulation (D) in *L. lactis* DA (■) and *L. lactis* DA/pB6nox (●) after aerobic cultivation in GM 17 medium. In panels (A), (B), (C) and (D) the values are means ± standard deviations of three independent experiments.  
doi:10.1371/journal.pone.0036296.g005

## Cell survival and H<sub>2</sub>O<sub>2</sub> accumulation

To evaluate the effects of increased NoxE activity on the viability of *L. lactis* under aerobic conditions, *L. lactis* DA and *L. lactis* DA/pB6nox were cultured aerobically for 24 h, after which the cultures were transferred to 4°C and cell viability was examined at intervals over one month. As shown in Figure 5C, initially, the cell populations of the two cultures reached approximately  $2.0 \times 10^{10}$  per mL. Viable counts of *L. lactis* DA dynamically dropped as time progressed, and a  $10^8$ -fold decrease was observed after 28 days of storage. Comparatively, the viability of the *L. lactis* DA/pB6nox culture remained approximately  $6.8 \times 10^6$  cells per mL, four orders of magnitude higher than that of *L. lactis* DA.

The H<sub>2</sub>O<sub>2</sub> concentration of the *L. lactis* DA and *L. lactis* DA/pB6nox cultures were tested to elucidate the cause of cell death under aerobic conditions. As shown in Figure 5D, in *L. lactis* DA, H<sub>2</sub>O<sub>2</sub> accumulated rapidly within 6 h of incubation and reached a concentration of  $78.44 \pm 9.29$  μM after 24 h. In contrast, H<sub>2</sub>O<sub>2</sub> accumulation was below 10 μM during 12 h of cultivation in *L. lactis* DA/pB6nox. After 24 h, the final H<sub>2</sub>O<sub>2</sub> concentration of *L. lactis* DA/pB6nox was  $18.08 \pm 0.33$  μM, which was 76.95% lower than that of *L. lactis* DA. The reduction in the H<sub>2</sub>O<sub>2</sub> concentration of *L. lactis* DA/pB6nox might have resulted from the elevated NoxE activity which catalyzed the oxidation of NADH by simultaneously reducing O<sub>2</sub> to H<sub>2</sub>O.

## Discussion

With the advent of metabolic engineering, *L. lactis* has received increasing attention with the aim to promote the flavor and health advantages of fermented products, through the production of, for example, homoalanine, diacetyl, mannitol and folate [10,29–33]. This study provided a platform for precisely regulating the metabolic flux via promoter engineering instead of the gene inactivation or overexpression in *L. lactis*. The partial redistribution of the pyruvate flux from lactate to diacetyl was achieved by controlling the *noxE* gene expression through a constitutive promoter library in *L. lactis*. Furthermore, we newly demonstrated that the elevated NoxE activity had a positive role in eliminating H<sub>2</sub>O<sub>2</sub> and prolonging the cell-survival of *L. lactis*.

Sequence alignment showed that the promoter of the *noxE* gene from *L. lactis* MG1363 possessed the typical promoter properties [34]. Therefore, the mutant strategy was performed to randomize the space sequence of the *noxE* promoter based on the previous method [35]. A total of 30 random promoters from 500 mutants were selected to form the constitutive promoter library, which displayed broad variability with small steps of activity change between 0.1 and 2.8-fold of the native promoter. Sequence analysis verified that any alteration of the bases in the conserved motifs and changes in the spacer length could lead to a drastic decrease of promoter strength, which supported the postulates in the previous report [36]. Moreover, the sequences outside the –10 and –35 region may influence promoter strength. Eleven typical promoters were used to confirm the effective and stable characteristics of the library through promoter strength measurements and the mRNA transcript levels of the *gfp* gene. In addition, the *noxE* gene was used to prove the broad application range of the promoter library. NoxE activity showed a nearly linear correlation with promoter activity. Consequently, we developed a constitutive promoter library with a wide promoter activity range for fine-tuning of gene expression in *L. lactis*, regardless of the target gene context.

Although the nisin controlled gene expression (NICE) system has been utilized extensively in *L. lactis* [37], some shortcomings

confined it to laboratory experimental conditions, including inducer usage, expression delay and heterogeneity of transcription levels in cell population [35]. Therefore, practical and stable properties of constitutive gene expression systems are desired in large-scale processes. The stable expression of GFP and NoxE driven by random promoters confirmed that the constitutive promoter library could meet the demands of the industrial fermentation process.

Cofactors are essential in completing a large number of biochemical reactions, and their manipulation has been proved to have great influences on metabolic networks [38]. The H<sub>2</sub>O-forming NADH oxidase specifically utilizes NADH and provides an extra route for the regeneration of NAD<sup>+</sup> when O<sub>2</sub> is available [39,40]. In this study, eleven typical promoters from the promoter library were chosen to precisely control the *noxE* expression and the intracellular NADH/NAD<sup>+</sup> ratios were pinpointly regulated. The direct oxidation of NADH necessary for pyruvate reduction by the increased NoxE activity resulted in a diminished pyruvate flux towards lactate via LDH, and the pyruvate flux was redistributed to the ALS pathway. Subsequently, α-acetolactate was decarboxylated into diacetyl in the presence of O<sub>2</sub>. The Metabolic Control Analysis (MCA) prediction and experimental observation showed that the glycolytic flux to the α-acetolactate branch was less than 0.1% in wild-type *L. lactis* [41]. However, the increasing NoxE activity driven by the eleven promoters led to the increase of 5.98% to 23.88% flux towards α-acetolactate and retained 67.29% to 33.96% flux to lactate. Acetate production exhibited a slight increase, probably due to the specific PDH activity which catalyzed the conversion of pyruvate to acetyl-CoA with the regeneration of NADH under aerobic conditions [42]. Moreover, neither formate nor ethanol was detected, indicating that no flux was distributed to the pyruvate formate lyase pathway and the alcohol dehydrogenase pathway, which was in agreement with the previous report [43]. In the milk fermentation process, the carbon flux was apportioned to lactate and diacetyl in 4:1 proportion in *L. lactis* DA/pB6nox, in which the diacetyl yield was significantly improved as compared to the wild-type strain. Accordingly, through the precise control of the *noxE* gene expression levels by the constitutive promoter library, the tight constraint on the end-product fluxes in the wild type was alleviated by the gradual lowering of NADH/NAD<sup>+</sup> ratios, yielding a series of recombinant strains with small differences in the proportion of lactate and diacetyl production among the end metabolites, which provide potential strains to optimize metabolite distribution.

Generally, the tolerance of lactic acid bacteria to O<sub>2</sub> requires the presence of either catalase, NADH oxidases (dehydrogenase), superoxidase dismutase (SOD) or thiol-oxidase enzyme system [44]. There are more than seven NADH oxidase and dehydrogenase genes in the *L. lactis* genome, including *noxA*, *noxB*, *noxC*, *noxD*, *noxE*, *yphA* and *aphF* [45,46]. NoxA and NoxB are two membrane-integrated NADH-dehydrogenases and have been demonstrated to be components of the electron transfer chain (ETC) [47]. NoxC and NoxD are described as H<sub>2</sub>O<sub>2</sub>-forming NADH oxidases, however there is no experimental evidence to support this [48]. NoxE is a well characterized H<sub>2</sub>O-forming NADH oxidase [39]. The *yphA* gene encodes a NADH dehydrogenase similar to that of *Aquifex aeolicus*, which participates in aerobic energy metabolism [45]. AhpF is an H<sub>2</sub>O<sub>2</sub>-forming NADH oxidase, constituting the alkyl hydroperoxide reductase (AhpR) system [49]. Whole-genome transcriptome analysis has revealed that the H<sub>2</sub>O<sub>2</sub>-forming NADH oxidase and SOD were induced to alleviate oxidative stress under aerobic conditions, resulting in H<sub>2</sub>O<sub>2</sub> accumulation [50]. In addition, a small amount of H<sub>2</sub>O<sub>2</sub> in aerated cultures of *L. lactis* may also result from pyruvate oxidase activity (POX,



encoded by the *poxL* gene) [51]. However, *L. lactis* is catalase-negative, so the considerable H<sub>2</sub>O<sub>2</sub> accumulation leads to oxidative damage [52]. Figure 5C and 5D showed that the H<sub>2</sub>O<sub>2</sub> concentration of the recombinant strain *L. lactis*DA/pB6nox was markedly reduced and the cell viability was significantly elevated compared with the wild-type strain. This variance could be the result of the elevated NoxE activity in the recombinant strain. Firstly, more dissolved O<sub>2</sub> was consumed in the H<sub>2</sub>O-forming reaction by the elevated NoxE activity, which reduced the substrate O<sub>2</sub> involved in the H<sub>2</sub>O<sub>2</sub>-forming reaction. Secondly, in *L. lactis*, NADH can be consumed by NoxE, LDH and H<sub>2</sub>O<sub>2</sub>-forming NADH oxidase. Because NoxE possesses much higher affinity for NADH (*K<sub>m</sub>* = 4.1 μM) than the other H<sub>2</sub>O<sub>2</sub>-forming NADH oxidase (for example, the *K<sub>m</sub>* value of NADH for AhpF was 76 μM), it succeeded in competing with the H<sub>2</sub>O<sub>2</sub>-forming NADH oxidase for the substrate NADH, leading to lower H<sub>2</sub>O<sub>2</sub> production [39,53]. Moreover, although the *K<sub>m</sub>* value of the LDH (10 μM) for NADH could compare with that of the NoxE, there is no H<sub>2</sub>O<sub>2</sub> generation in the reaction catalyzed by LDH. Subsequently, decreased H<sub>2</sub>O<sub>2</sub> accumulation could effectively prevent the formation of HO· via the Fenton reaction and reduce ROS [54], therefore enabling *L. lactis* to be resistant to oxidative stress for achieving long-term cell survival.

## References

- Kleerebezem M, Hugenholtz J (2003) Metabolic pathway engineering in lactic acid bacteria. *Curr Opin Biotechnol* 14: 232–237.
- Leroy F, De Vuyst L (2004) Lactic acid bacteria as functional starter cultures for the food fermentation industry. *Trends in Food Science & Technology* 15: 67–78.
- Hugenholtz J (2008) The lactic acid bacterium as a cell factory for food ingredient production. *International Dairy Journal* 18: 466–475.
- Kleerebezem M, Boels IC, Groot MN, Mierau I, Sybesma W, et al. (2002) Metabolic engineering of *Lactococcus lactis*: the impact of genomics and metabolic modelling. *Journal of biotechnology* 98: 199–213.
- de Vos WM, Hugenholtz J (2004) Engineering metabolic highways in *Lactococcus* and other lactic acid bacteria. *Trends Biotechnol* 22: 72–79.
- Neves AR, Pool WA, Kok J, Kuipers OP, Santos H (2005) Overview on sugar metabolism and its control in *Lactococcus lactis*-the input from in vivo NMR. *FEMS microbiology reviews* 29: 531–554.
- Bassit N, Boquien CY, Pique D, Corrieu G (1993) Effect of Initial Oxygen Concentration on Diacetyl and Acetoin Production by *Lactococcus lactis* subsp. *lactis* biovar diacetylactis. *Appl Environ Microbiol* 59: 1893–1897.
- Lopez de Felipe F, Kleerebezem M, de Vos WM, Hugenholtz J (1998) Cofactor engineering: a novel approach to metabolic engineering in *Lactococcus lactis* by controlled expression of NADH oxidase. *J Bacteriol* 180: 3804–3808.
- Koebmann BJ, Andersen HW, Solem C, Jensen PR (2002) Experimental determination of control of glycolysis in *Lactococcus lactis*. *Antonie Van Leeuwenhoek* 82: 237–248.
- Kleerebezem M, Hols P, Hugenholtz J (2000) Lactic acid bacteria as a cell factory: rerouting of carbon metabolism in *Lactococcus lactis* by metabolic engineering. *Enzyme and microbial technology* 26: 840–848.
- Platteeuw C, Hugenholtz J, Starrenburg M, van Alen-Boerrigter I, de Vos WM (1995) Metabolic engineering of *Lactococcus lactis*: influence of the overproduction of alpha-acetolactate synthase in strains deficient in lactate dehydrogenase as a function of culture conditions. *Appl Environ Microbiol* 61: 3967–3971.
- Liu SQ (2003) Practical implications of lactate and pyruvate metabolism by lactic acid bacteria in food and beverage fermentations. *Int J Food Microbiol* 83: 115–131.
- Alper H, Fischer C, Nevoigt E, Stephanopoulos G (2005) Tuning genetic control through promoter engineering. *Proc Natl Acad Sci U S A* 102: 12678–12683.
- Mijakovic I, Petranovic D, Jensen PR (2005) Tunable promoters in systems biology. *Curr Opin Biotechnol* 16: 329–335.
- Hammer K, Mijakovic I, Jensen PR (2006) Synthetic promoter libraries—tuning of gene expression. *Trends Biotechnol* 24: 53–55.
- Andersen HW, Pedersen MB, Hammer K, Jensen PR (2001) Lactate dehydrogenase has no control on lactate production but has a strong negative control on formate production in *Lactococcus lactis*. *European Journal of Biochemistry* 268: 6379–6389.
- Jeppsson M, Johansson B, Jensen PR, Hahn-Hägerdal B, Gorwa-Grauslund MF (2003) The level of glucose-6-phosphate dehydrogenase activity strongly influences xylose fermentation and inhibitor sensitivity in recombinant *Saccharomyces cerevisiae* strains. *Yeast* 20: 1263–1272.
- Duwat P, Sourice S, Cesselin B, Lamberet G, Vido K, et al. (2001) Respiration capacity of the fermenting bacterium *Lactococcus lactis* and its positive effects on growth and survival. *J Bacteriol* 183: 4509–4516.
- Gaudu P, Vido K, Cesselin B, Kulakauskas S, Tremblay J, et al. (2002) Respiration capacity and consequences in *Lactococcus lactis*. *Antonie Van Leeuwenhoek* 82: 263–269.
- Marty-Teyssat C, de la Torre F, Garel J (2000) Increased production of hydrogen peroxide by *Lactobacillus delbrueckii* subsp. *bulgaricus* upon aeration: involvement of an NADH oxidase in oxidative stress. *Appl Environ Microbiol* 66: 262–267.
- Gasson MJ (1983) Plasmid complements of *Streptococcus lactis* NCDO 712 and other lactic streptococci after protoplast-induced curing. *J Bacteriol* 154: 1–9.
- Sambrook J, Fritsch EF, Maniatis T (1989) *Molecular cloning*. 2. New York: Cold Spring Harbor Laboratory Press.
- Holo H, Nes IF (1989) High-Frequency Transformation, by Electroporation, of *Lactococcus lactis* subsp. *cremoris* Grown with Glycine in Osmotically Stabilized Media. *Appl Environ Microbiol* 55: 3119–3123.
- Benson K, Godon JJ, Renault P, Griffin H, Gasson M (1996) Effect of *ibaRN*-encoded  $\alpha$ -acetolactate synthase expression on diacetyl production in *Lactococcus lactis*. *Applied microbiology and biotechnology* 45: 107–111.
- San KY, Bennett GN, Berrios-Rivera SJ, Vadali RV, Yang YT, et al. (2002) Metabolic engineering through cofactor manipulation and its effects on metabolic flux redistribution in *Escherichia coli*. *Metabolic engineering* 4: 182–192.
- Bernofsky C, Swan M (1973) An improved cycling assay for nicotinamide adenine dinucleotide. *Anal Biochem* 53: 452–458.
- Leonardo MR, Dailly Y, Clark DP (1996) Role of NAD in regulating the *adhE* gene of *Escherichia coli*. *J Bacteriol* 178: 6013–6018.
- Maguin E, Duwat P, Hege T, Ehrlich D, Gruss A (1992) New thermosensitive plasmid for gram-positive bacteria. *J Bacteriol* 174: 5633–5638.
- Stephanopoulos G (1999) Metabolic fluxes and metabolic engineering. *Metab Eng* 1: 1–11.
- Hols P, Kleerebezem M, Schanck AN, Ferain T, Hugenholtz J, et al. (1999) Conversion of *Lactococcus lactis* from homolactic to homoalanine fermentation through metabolic engineering. *Nat Biotechnol* 17: 588–592.
- Hugenholtz J, Kleerebezem M, Starrenburg M, Delcour J, De Vos W, et al. (2000) *Lactococcus lactis* as a cell factory for high-level diacetyl production. *Appl Environ Microbiol* 66: 4112–4114.
- Wisselink HW, Mars AE, Van Der Meer P, Eggink G, Hugenholtz J (2004) Metabolic engineering of mannitol production in *Lactococcus lactis*: influence of overexpression of mannitol 1-phosphate dehydrogenase in different genetic backgrounds. *Appl Environ Microbiol* 70: 4286–4292.
- Sybesma W, Starrenburg M, Kleerebezem M, Mierau I, De Vos WM, et al. (2003) Increased production of folate by metabolic engineering of *Lactococcus lactis*. *Appl Environ Microbiol* 69: 3069–3076.
- de Vos WM, Simons G, Gasson M (1994) Gene cloning and expression systems in *Lactococcus*. *Genetics and biotechnology of lactic acid bacteria*. pp 52–105.
- Jensen PR, Hammer K (1998) The sequence of spacers between the consensus sequences modulates the strength of prokaryotic promoters. *Appl Environ Microbiol* 64: 82–87.

## Acknowledgments

We would like to thank N. Galleron for kindly providing the plasmid pSec:leiss:Nuc. We also thank I. Biswas and E. Maguin for their generous gift of the plasmid pG<sup>+</sup> host4.

## Author Contributions

Conceived and designed the experiments: TG JK SH. Performed the experiments: TG LZ CZ. Analyzed the data: TG JK SH. Contributed reagents/materials/analysis tools: TG JK LZ CZ. Wrote the paper: TG JK.

36. Solem C, Jensen PR (2002) Modulation of gene expression made easy. *Appl Environ Microbiol* 68: 2397–2403.
37. Mierau I, Kleerebezem M (2005) 10 years of the nisin-controlled gene expression system (NICE) in *Lactococcus lactis*. *Appl Microbiol Biotechnol* 68: 705–717.
38. Heux S, Cachon R, Dequin S (2006) Cofactor engineering in *Saccharomyces cerevisiae*: Expression of a H<sub>2</sub>O-forming NADH oxidase and impact on redox metabolism. *Metab Eng* 8: 303–314.
39. Lopez de Felipe F, Hugenholtz J (2001) Purification and characterisation of the water forming NADH-oxidase from *Lactococcus lactis*. *International Dairy Journal* 11: 37–44.
40. Neves AR, Ventura R, Mansour N, Shearman C, Gasson MJ, et al. (2002) Is the Glycolytic Flux in *Lactococcus lactis* Primarily Controlled by the Redox Charge? *Journal of Biological Chemistry* 277: 28088–28098.
41. Hoefnagel MH, Starrenburg MJ, Martens DE, Hugenholtz J, Kleerebezem M, et al. (2002) Metabolic engineering of lactic acid bacteria, the combined approach: kinetic modelling, metabolic control and experimental analysis. *Microbiology* 148: 1003–1013.
42. Papagianni M, Avramidis N, Filiouis G (2007) Glycolysis and the regulation of glucose transport in *Lactococcus lactis* spp. *lactis* in batch and fed-batch culture. *Microb Cell Fact* 6: 16.
43. Jensen NB, Melchiorsen CR, Jokumsen KV, Villadsen J (2001) Metabolic behavior of *Lactococcus lactis* MG1363 in microaerobic continuous cultivation at a low dilution rate. *Appl Environ Microbiol* 67: 2677–2682.
44. Vogel RF, Pavlovic M, Ehrmann MA, Wiezer A, Liesegang H, et al. (2011) Genomic analysis reveals *Lactobacillus sanfranciscensis* as stable element in traditional sourdoughs. *Microb Cell Fact* 10 Suppl 1: S6.
45. Bolotin A, Wincker P, Mauger S, Jaillon O, Malarne K, et al. (2001) The complete genome sequence of the lactic acid bacterium *Lactococcus lactis* ssp. *lactis* IL1403. *Genome Res* 11: 731–753.
46. Wegmann U, O'Connell-Motherway M, Zomer A, Buist G, Shearman C, et al. (2007) Complete genome sequence of the prototype lactic acid bacterium *Lactococcus lactis* subsp. *cremoris* MG1363. *J Bacteriol* 189: 3256–3270.
47. Tachon S, Michelon D, Chambellon E, Cantonnet M, Mezange C, et al. (2009) Experimental conditions affect the site of tetrazolium violet reduction in the electron transport chain of *Lactococcus lactis*. *Microbiology* 155: 2941–2948.
48. Odamaki T, Xiao J, Yonezawa S, Yaeshima T, Iwatsuki K (2011) Improved viability of bifidobacteria in fermented milk by cocultivation with *Lactococcus lactis* subspecies *lactis*. *Journal of dairy science* 94: 1112–1121.
49. Tachon S, Brandsma JB, Yvon M (2010) NoxE NADH oxidase and the electron transport chain are responsible for the ability of *Lactococcus lactis* to decrease the redox potential of milk. *Appl Environ Microbiol* 76: 1311–1319.
50. Pedersen MB, Garrigues C, Tuphile K, Brun C, Vido K, et al. (2008) Impact of aeration and heme-activated respiration on *Lactococcus lactis* gene expression: identification of a heme-responsive operon. *J Bacteriol* 190: 4903–4911.
51. Pudlik AM, Lolkema JS (2011) Citrate uptake in exchange with intermediates in the citrate metabolic pathway in *Lactococcus lactis* IL1403. *J Bacteriol* 193: 706–714.
52. Rezaiki L, Cesselin B, Yamamoto Y, Vido K, van West E, et al. (2004) Respiration metabolism reduces oxidative and acid stress to improve long-term survival of *Lactococcus lactis*. *Mol Microbiol* 53: 1331–1342.
53. Jiang R, Bommarius AS (2004) Hydrogen peroxide-producing NADH oxidase (nox-1) from *Lactococcus lactis*. *Tetrahedron: Asymmetry* 15: 2939–2944.
54. Bruno-Barcena JM, Andrus JM, Libby SL, Klaenhammer TR, Hassan HM (2004) Expression of a heterologous manganese superoxide dismutase gene in intestinal lactobacilli provides protection against hydrogen peroxide toxicity. *Appl Environ Microbiol* 70: 4702–4710.
55. Le Loir Y, Gruss A, Ehrlich SD, Langella P (1998) A nine-residue synthetic propeptide enhances secretion efficiency of heterologous proteins in *Lactococcus lactis*. *J Bacteriol* 180: 1895–1903.
